# Supplementary material for: Comparative clinical effectiveness and cost effectiveness of endovascular strategy v open repair for ruptured abdominal aortic aneurysm: three year results of the IMPROVE randomised trial
Source: PubMed Central journal article supplement (PMC5682594; doi:10.1136/bmj.j4859), 2017-11-14
Supplement: pulu039133.ww1.pdf [file pulu039133.ww1.pdf]

**Appendix 1:** Supplementary Tables [posted as supplied by author]

**Table A** Aneurysm-related re-interventions for life-threatening conditions. These are based on the scoring system developed for the EVAR 1 trial (8), with additional re-interventions scored by IMPROVE trial investigators.

| <b>Procedures for life-threatening aneurysm-related complications</b>                                                                                     |
|-----------------------------------------------------------------------------------------------------------------------------------------------------------|
| Conversion of failed EVAR to open repair                                                                                                                  |
| Axillo-bifemoral bypass for graft infection or aortic occlusion                                                                                           |
| Re-operation of open or endovascular repair for graft infection, aneurysm extension above or below the original graft, secondary rupture or other reasons |
| Endovascular repair of proximal (type 1a endoleak) or distal (type 1b endoleak)                                                                           |
| First laparotomy for abdominal compartment syndrome                                                                                                       |
| Hindquarter amputation                                                                                                                                    |
| Colectomy ± stoma formation for mesenteric or colonic ischaemia in 1 <sup>o</sup> or later admission                                                      |

Other aneurysm-related procedures included endovascular procedures to the aorta including stapling, ligation, sclerosis or embolization of type 2 endoleaks, femoro-femoral cross-over grafting, distal graft limb revascularisation (open or endovascular), lower limb revascularisation (open or endovascular), leg amputation (above, through or below knee), incisional hernia repair, laparotomy for adhesions or small bowel obstruction, access site repairs and other minor procedures.

**Table B** Source of ]re-intervention data in 502 patients with repair of rupture started.

| <b>Time period re-intervention</b> | <b>Principal source according to protocol</b> | <b>Primary source of re-intervention data</b> |             |                               |              | <b>No. re-interventions identified</b>       |
|------------------------------------|-----------------------------------------------|-----------------------------------------------|-------------|-------------------------------|--------------|----------------------------------------------|
|                                    |                                               | <b>Trial co-ordinator</b>                     | <b>HES*</b> | <b>Patient questionnaires</b> | <b>Audit</b> |                                              |
| <b>0-1 year</b>                    | <b>Trial co-ordinator</b>                     | <b>162</b>                                    | <b>5</b>    | <b>2</b>                      | <b>22</b>    | <b>191,</b><br>with 0 at non-trial hospitals |
| <b>1-3 years</b>                   | <b>Audit, supported by HES</b>                | <b>20</b>                                     | <b>10</b>   | <b>1</b>                      | <b>17</b>    | <b>48</b><br>with 2 at non-trial hospitals   |
|                                    |                                               |                                               |             |                               |              |                                              |

\*Health Episode Statistics for England only, providing data for trial and non-trial hospitals to 3 years after patient discharge from primary admission. During the first year, all data from HES or questionnaires were subsequently verified by the trial co-ordinators: there were an additional 6 patients with other surgery not related to the AAA. Between 1 and 3 years all data from HES or questionnaires were verified by audit. Data from the trial co-ordinators were verified by audit. Audit also identified patients with first and subsequent re-interventions beyond 3 years.

**Table C** Variables considered for multiple imputations

| <b>Variable</b>                                        | <b>Missing values<sup>a</sup> N (%)</b> | <b>Imputation model</b>  |
|--------------------------------------------------------|-----------------------------------------|--------------------------|
| <i>Baseline variables and vital status<sup>a</sup></i> |                                         |                          |
| Loss of consciousness during care episode              | 27 (4%)                                 | Logistic regression      |
| Admission haemoglobin                                  | 6 (1%)                                  | Predictive mean matching |
| Admission creatinine                                   | 13 (2%)                                 | Predictive mean matching |
| Acute myocardial ischaemia                             | 52 (8%)                                 | Logistic regression      |
| Lowest recorded systolic blood pressure                | 46 (8%)                                 | Predictive mean matching |
| Lowest recorded diastolic blood pressure               | 53 (9%)                                 | Predictive mean matching |
| Maximum aortic diameter <sup>b</sup>                   | 95 (15%)                                | Predictive mean matching |
| Aneurysm neck diameter <sup>b</sup>                    | 230 (38%)                               | Predictive mean matching |
| Aneurysm proximal neck angle <sup>b</sup>              | 132 (22%)                               | Predictive mean matching |
| Aneurysm neck length <sup>b</sup>                      | 132 (22%)                               | Predictive mean matching |
| Death within 3 years                                   | 4 (1%)                                  | None done                |
| <i>Resource use variables<sup>a</sup></i>              |                                         |                          |
| Primary admission - Time in theatre                    | 22 (4%)                                 | Predictive mean matching |
| Primary admission - Days in critical care              | 13 (2%)                                 | Predictive mean matching |
| Primary admission - Days in routine ward               | 48 (8%)                                 | Predictive mean matching |
| Re-admissions up to 36months - days in critical care   | 32 (11%)                                | Predictive mean matching |
| Re-admission up to 36 months- days in routine ward     | 31 (10%)                                | Predictive mean matching |
| Outpatient visits at 12 months                         | 47 (16%)                                | Predictive mean matching |
| Family doctor visits at 12 months                      | 83 (28%)                                | Predictive mean matching |
| Nurse at home visits at 12 months                      | 68 (23%)                                | Predictive mean matching |
| <i>Quality-of-life (QoL) variables</i>                 |                                         |                          |
| EQ-5D at 3 months                                      | 66 (21%)                                | Predictive mean matching |
| EQ-5D at 12 months                                     | 72 (24%)                                | Predictive mean matching |
| EQ-5D at 36 months                                     | 50 (19%)                                | Predictive mean matching |

<sup>a</sup>For baseline variables, vital status and primary admissions, the overall sample size was all randomised patients (n=613). Baseline EQ-5D was neither obtained nor imputed in critically ill patients requiring urgent surgery to avoid death. For other resource use and QoL variables, the relevant sample sizes were those patients eligible for the 3, 12 and 36 month follow-up (n=318, 3 months, n=301, 12 months, and n=258, 36 months respectively). <sup>b</sup>conditional on ruptured AAA, symptomatic AAA or incidental AAA in final diagnosis..

**Table D** Unadjusted and adjusted hazard ratios for endovascular strategy versus open repair, for both all-cause and aneurysm-related mortality in the full trial cohort (n=613)

Overall

|                                   | <b>N</b> | <b>Hazard Ratio (95% CI)</b> | <b>p-value</b> |
|-----------------------------------|----------|------------------------------|----------------|
| <b>All-cause mortality</b>        |          |                              |                |
| Unadjusted                        | 613      | 0.92 (0.75, 1.13)            | 0.41           |
| *Adjusted (complete-cases)        | 506      | 0.91 (0.72, 1.14)            | 0.41           |
| *Adjusted (multiply imputed)      | 613      | 0.90 (0.73, 1.10)            | 0.31           |
| <b>Aneurysm-related mortality</b> |          |                              |                |
| Unadjusted                        | 613      | 0.90 (0.69, 1.16)            | 0.41           |
| *Adjusted (complete-cases)        | 506      | 0.89 (0.67, 1.19)            | 0.44           |
| *Adjusted (multiply imputed)      | 613      | 0.88 (0.68, 1.15)            | 0.35           |

\*Adjusted for age, sex, Hardman index, and lowest systolic blood pressure.

By time period

|                                   | <b>No. remaining under follow-up</b> | <b>Unadjusted Hazard Ratio (95% CI)</b> | <b>p-value</b> |
|-----------------------------------|--------------------------------------|-----------------------------------------|----------------|
| <b>All-cause mortality</b>        |                                      |                                         |                |
| 0-3 months                        | 613                                  | 0.98 (0.76, 1.26)                       | 0.88           |
| >3 months – 3 years               | 373                                  | 0.57 (0.36, 0.90)                       | 0.015          |
| >3 years                          | 293                                  | 1.44 (0.80, 2.62)                       | 0.23           |
| <b>Aneurysm-related mortality</b> |                                      |                                         |                |
| 0-3 months                        | 613                                  | 0.90 (0.69, 1.17)                       | 0.43           |
| >3 months – 3 years               | 373                                  | 0.88 (0.26, 3.06)                       | 0.85           |
| >3 years                          | 293                                  | 0.96 (0.19, 4.78)                       | 0.96           |

**Table E** Re-interventions by randomised group according to time period and if for a life-threatening condition in 502 patients with repair of rupture started.

|                                                          | <b>Ruptured AAA patients who commenced operation<br/>N=502</b> |                    |
|----------------------------------------------------------|----------------------------------------------------------------|--------------------|
| <b>AAA-related re-intervention</b>                       | <b>EVAR strategy</b>                                           | <b>Open repair</b> |
| No. patients with ≥1 re-intervention                     | 75 / 259 (29%)                                                 | 66 / 243 (27%)     |
| No. re-interventions/p-years (rate per 100 person-years) | 121/463.8 (26.0)                                               | 110/387.3 (28.4)   |
| Arterial                                                 | 93 (77%)                                                       | 63 (57%)           |
| Laparotomy                                               | 16 (13%)                                                       | 34 (31%)           |
| Other                                                    | 12 (10%)                                                       | 13 (12%)           |
| For a life-threatening arterial-related condition        |                                                                |                    |
| Yes                                                      | 37 (40%)                                                       | 40 (63%)           |
| no                                                       | 56 (60%)                                                       | 23 (37%)           |
| For a life-threatening laparotomy-related condition      |                                                                |                    |
| Yes                                                      | 5 (31%)                                                        | 4 (12%)            |
| No                                                       | 11 (69%)                                                       | 30 (88%)           |
| <b>Randomisation to 3 months</b>                         |                                                                |                    |
| No. patients with at least one re-intervention           | 57/259 (22%)                                                   | 52/243 (21%)       |
| No. re-interventions/p-years (rate per 100 person-years) | 81/43.6 (185.6)                                                | 89/38.9 (228.6)    |
| Arterial                                                 | 60 (74%)                                                       | 50 (56%)           |
| Laparotomy                                               | 11 (14%)                                                       | 27 (31%)           |
| Other                                                    | 10 (12%)                                                       | 12 (14%)           |
| For a life-threatening arterial-related condition        |                                                                |                    |
| Yes                                                      | 26 (43%)                                                       | 33 (66%)           |
| no                                                       | 34 (57%)                                                       | 16 (34%)           |
| For a life-threatening laparotomy-related condition      |                                                                |                    |
| Yes                                                      | 2 (18%)                                                        | 3 (11%)            |
| No                                                       | 9 (82%)                                                        | 24 (89%)           |
| <b>&gt; 3 months – 3 years</b>                           |                                                                |                    |
| No. patients with at least one re-intervention           | 27/167 (16%)                                                   | 15/146 (10%)       |
| No. re-interventions/p-years (rate per 100 person-years) | 40/420.1 (9.5)                                                 | 21/348.3 (6.0)     |
| Arterial                                                 | 33 (83%)                                                       | 13 (62%)           |
| Laparotomy                                               | 5 (13%)                                                        | 7 (33%)            |
| Other                                                    | 2 (5%)                                                         | 1 (5%)             |
| For a life-threatening arterial-related condition        |                                                                |                    |
| Yes                                                      | 11 (33%)                                                       | 7 (54%)            |
| no                                                       | 22 (67%)                                                       | 6 (46%)            |
| For a life-threatening laparotomy-related condition      |                                                                |                    |
| Yes                                                      | 3 (60%)                                                        | 1 (14%)            |
| No                                                       | 2 (40%)                                                        | 6 (86%)            |

**Table F** Unadjusted and adjusted hazard ratios for EVAR strategy versus open repair, for time to first AAA re-intervention and time to any reintervention within the first 3-years of follow-up for 502 patients with repair of rupture started.

| Rate per 100 person-years<br>(no./p-years)                                |                     | Model                           | N   | Hazard Ratio<br>(95% CI) | p-value |
|---------------------------------------------------------------------------|---------------------|---------------------------------|-----|--------------------------|---------|
| <b>Time to first aneurysm-related re-intervention</b>                     |                     |                                 |     |                          |         |
| <b>EVAR strategy</b>                                                      | <b>Open repair</b>  |                                 |     |                          |         |
| 22.6<br>(75/331.5)                                                        | 20.8<br>(65/313.1)  | Unadjusted                      | 502 | 1.11 (0.80, 1.55)        | 0.53    |
|                                                                           |                     | *Adjusted<br>(complete-cases)   | 343 | 1.08 (0.73, 1.62)        | 0.70    |
|                                                                           |                     | *Adjusted<br>(multiply imputed) | 502 | 1.12 (0.80, 1.56)        | 0.51    |
| <b>Time to any aneurysm-related re-intervention (Anderson-Gill model)</b> |                     |                                 |     |                          |         |
| <b>Overall</b>                                                            |                     |                                 |     |                          |         |
| <b>EVAR strategy</b>                                                      | <b>Open repair</b>  |                                 |     |                          |         |
| 26.1<br>(121/463.8)                                                       | 28.1<br>(109/387.3) | Unadjusted                      | 502 | 1.02 (0.79, 1.32)        | 0.88    |
|                                                                           |                     | *Adjusted<br>(complete-cases)   | 343 | 0.92 (0.68, 1.26)        | 0.62    |
|                                                                           |                     | *Adjusted<br>(multiply imputed) | 502 | 1.04 (0.80, 1.35)        | 0.79    |
| <b>0-3 months</b>                                                         |                     |                                 |     |                          |         |
| <b>EVAR strategy</b>                                                      | <b>Open repair</b>  |                                 |     |                          |         |
| 185.6<br>(81/43.6)                                                        | 226.1<br>(88/38.9)  | Unadjusted                      | 502 | 0.88 (0.65, 1.19)        | 0.40    |
|                                                                           |                     | *Adjusted<br>(complete-cases)   | 343 | 0.78 (0.55, 1.11)        | 0.16    |
|                                                                           |                     | *Adjusted<br>(multiply imputed) | 502 | 0.88 (0.65, 1.20)        | 0.43    |
| <b>&gt;3 months – 3 years</b>                                             |                     |                                 |     |                          |         |
| <b>EVAR strategy</b>                                                      | <b>Open repair</b>  |                                 |     |                          |         |
| 9.5<br>(40/420.1)                                                         | 6.0<br>(21/348.3)   | Unadjusted                      | 313 | 1.57 (0.93, 2.67)        | 0.09    |
|                                                                           |                     | *Adjusted<br>(complete-cases)   | 217 | 1.67 (0.82, 3.43)        | 0.16    |
|                                                                           |                     | *Adjusted<br>(multiply imputed) | 313 | 1.54 (0.90, 2.62)        | 0.12    |

\*Adjusted for age, sex, Hardman index, lowest systolic blood pressure, neck length.

**Table G** Indications for midterm re-interventions (between 3 months and 3 years) in 502 patients with repair of rupture started.

| <b>Aneurysm-related indications<br/>For 313 repairs with rupture<br/>started who survived beyond 90<br/>days</b> | Randomised to<br>EVAR strategy<br>N=167 | Randomised to<br>open repair<br>N=146 | EVAR<br>N=125     | Open<br>repair<br>N=188 |
|------------------------------------------------------------------------------------------------------------------|-----------------------------------------|---------------------------------------|-------------------|-------------------------|
| Access site                                                                                                      | 3                                       | 1                                     | 2                 | 2                       |
| Bowel ischaemia                                                                                                  | 2                                       | 1                                     | 0                 | 3                       |
| Distal aneurysm                                                                                                  | 3                                       | 4                                     | 3                 | 4                       |
| Endograft kinking                                                                                                | 2                                       | 2                                     | 4                 | 0                       |
| Endograft migration                                                                                              | 1                                       | 0                                     | 1                 | 0                       |
| Endoleak*                                                                                                        | 14                                      | 2                                     | 16                | 0                       |
| False aneurysm                                                                                                   | 1                                       | 0                                     | 1                 | 0                       |
| Graft thrombosis/occlusion                                                                                       | 6                                       | 1                                     | 4                 | 3                       |
| Graft infection - aorta                                                                                          | 0                                       | 2                                     | 0                 | 2                       |
| Graft infection – fem-fem                                                                                        | 0                                       | 0                                     | 0                 | 0                       |
| Incisional hernia                                                                                                | 0                                       | 3                                     | 0                 | 3                       |
| Limb ischaemia                                                                                                   | 2                                       | 2                                     | 3                 | 1                       |
| Ostomy                                                                                                           | 0                                       | 1                                     | 0                 | 1                       |
| Proximal aneurysm                                                                                                | 1                                       | 0                                     | 1                 | 0                       |
| Secondary rupture**                                                                                              | 2                                       | 0                                     | 2                 | 0                       |
| Symptomatic adhesions                                                                                            | 1                                       | 1                                     | 0                 | 2                       |
| <b>Other indications</b>                                                                                         |                                         |                                       |                   |                         |
| Nutritional support                                                                                              | 0                                       | 1                                     | 0                 | 1                       |
| Renal failure                                                                                                    | 1                                       | 0                                     | 1                 | 0                       |
| <b>Total re-interventions</b>                                                                                    | 39 in 27 patients                       | 21 in 15 patients                     | 38 in 26 patients | 22 in 16 patients       |

\* 4 type 1A (one also had type 2), 2 type 1B (one also had type 2), 9 type 2 only and 1 type 3; \*\* one patient with a type 1A endoleak and renal failure requiring dialysis and one with a type 1B endoleak.

In 3 patients two indications were treated in the same session, one for bowel ischaemia and incisional hernia, one for type 1A endoleak and fistula formation for renal dialysis and one for type 1B endoleak and common iliac aneurysm.

In those randomised to the EVAR strategy, 17/39 of the re-interventions were for a life-threatening condition versus 7/21 in those randomised to open repair. In those having undergone EVAR 14/38 of the re-interventions were for life-threatening conditions versus 10/22 in those having undergone open repair.

**Table H** Incremental costs (£ GBP), QALYs and net monetary benefits [95% CI] (£ GBP) within 3-years of randomisation, by subgroups, at NICE\* recommended willingness to pay threshold for a QALY gain (£30,000 per QALY) in the total trial cohort (n=613).

\*NICE National Institute for Health and Care Excellence

| Subgroup      |                     | Incremental cost<br>[95% CI] | Incremental QALY<br>[95% CI] | Incremental net monetary benefit (INB)<br>[95% CI] <sup>a</sup> | Interaction p-value for INB |
|---------------|---------------------|------------------------------|------------------------------|-----------------------------------------------------------------|-----------------------------|
| Sex           | Male (N=480)        | -4066<br>[-7573, -557]       | 0.092<br>[-0.099, 0.283]     | 6824<br>[204, 13444]                                            | p= 0.440                    |
|               | Female (N=133)      | 2817<br>[-3806, 9439]        | 0.358<br>[0.038, 0.712]      | 7914<br>[-4401, 20229]                                          |                             |
| Hardman Index | Hardman=0 (N=164)   | -4017<br>[-9758, 1725]       | 0.016<br>[-0.141, 0.465]     | 8878<br>[-1686, 19442]                                          | p=0.279                     |
|               | Hardman=1 (N=254)   | -2448<br>[-7022, 2126]       | 0.005<br>[-0.244, 0.254]     | 2594<br>[-5943, 11131]                                          |                             |
|               | Hardman≥2 (N=121)   | -923<br>[-7306, 5461]        | 0.423<br>[0.092, 0.755]      | 13622<br>[2025, 25219]                                          |                             |
| Neck length   | Length < 22 (N=234) | -769<br>[-5595, 4057]        | 0.216<br>[-0.027, 0.459]     | 7243<br>[-1216, 15702]                                          | p=0.461                     |
|               | Length ≥ 22 (N=247) | -4250<br>[-8859, 358]        | 0.111<br>[-0.131, 0.352]     | 7568<br>[-959, 16095]                                           |                             |
| Lowest SBP    | SBP < 90 (N=263)    | -3881<br>[-8604, 842]        | 0.067<br>[-0.185, 0.319]     | 5881<br>[-2949, 14711]                                          | p=0.275                     |
|               | SBP ≥ 90 (N=305)    | -1540<br>[-5879, 2798]       | 0.213<br>[-0.013, 0.439]     | 7932<br>[-14.2, 15878]                                          |                             |

**Table I** Resource use, costs (£ GBP) and incremental net monetary benefits (£ GBP) up to 3 years, reported across all patients randomised (n=613). Mean (SD) unless stated. Results are reported after multiple imputation.

|                                                         | Resource use                  |                     | Cost (£)                      |                     |
|---------------------------------------------------------|-------------------------------|---------------------|-------------------------------|---------------------|
|                                                         | Endovascular strategy (n=316) | Open repair (n=297) | Endovascular strategy (n=316) | Open repair (n=297) |
| <b>Between randomisation and 1 year</b>                 |                               |                     |                               |                     |
| <b>Primary admission</b>                                |                               |                     |                               |                     |
| Days in critical care                                   | 5.3 (12.0)                    | 7.4 (11.9)          | 6672 (16430)                  | 9674 (16446)        |
| Days on routine ward                                    | 7.0 (11.9)                    | 7.8 (12.0)          | 1835 (3107)                   | 2031 (3158)         |
| Other resource use <sup>a</sup>                         |                               |                     | 6563 (3779)                   | 4757 (2896)         |
| Transfer to another hospital, N (%)                     | 10 (3%)                       | 36 (12%)            |                               |                     |
| Number of inpatient days                                | 0.7 (4.5)                     | 4.8 (21.1)          | 175 (1159)                    | 1245 (5479)         |
| Total days in primary admission                         | 13.0 (20.5)                   | 20.0 (31.9)         | 15245 (18356)                 | 17707 (20842)       |
| <b>Re-admissions</b>                                    |                               |                     |                               |                     |
| Re-admissions ≥ 1, N (%)                                | 27 (9%)                       | 11 (4%)             |                               |                     |
| Number of inpatient days                                | 0.7 (4.6)                     | 0.2 (1.5)           | 215 (1469)                    | 57 (433)            |
| <b>Re-interventions<sup>b</sup></b>                     |                               |                     |                               |                     |
| Re-interventions ≥ 1, N (%)                             | 64 (20%)                      | 60 (20%)            | 516 (1315)                    | 655 (1711)          |
| <b>Outpatient and community care<sup>c</sup></b>        |                               |                     | 525 (739)                     | 829 (5772)          |
| <b>Total days in hospital up to 1 year</b>              | 13.7 (21.3)                   | 20.2 (31.9)         | 16501 (19084)                 | 19248 (22365)       |
| <b>Between 1 and 3 years</b>                            |                               |                     |                               |                     |
| <b>Re-admissions</b>                                    |                               |                     |                               |                     |
| Re-admissions ≥ 1, N (%)                                | 24 (8%)                       | 12 (4%)             |                               |                     |
| Number of inpatient days                                | 0.7 (4.4)                     | 0.3 (2.3)           | 270 (1667)                    | 137 (981)           |
| <b>Re-interventions</b>                                 |                               |                     |                               |                     |
| Re-interventions ≥ 1, N (%)                             | 20 (6%)                       | 11 (4%)             | 107 (626)                     | 98 (690)            |
| <b>Total days in hospital up to 3 years</b>             | 14.4 (23.4)                   | 20.5 (32.1)         | 16878 (19624)                 | 19483 (22412)       |
| <b>Incremental cost (£) [95% CI]</b>                    |                               |                     | -2605 [-5966, 702]            |                     |
| <b>Incremental net monetary benefit (£)<sup>d</sup></b> |                               |                     | 7637 [1820, 13454]            |                     |

<sup>a</sup>Includes costs related to emergency room, CT scan, devices, consumables and theatre (see table J for sources). <sup>b</sup>Includes six re-interventions that were not related to AAA which is why the numbers reported here (n=124) differ to those for tables B and E (n=118). Also it should be noted that an individual patient can have a reintervention in both the time period between randomisation and 1 year and between 1 and 3 years. Hence simply summing the number of reinterventions across the two time periods would not give the same total number of re-interventions as in Table B. <sup>c</sup>Includes costs related to outpatient, GP and district nurse visits. <sup>d</sup>The INB for endovascular vs. open repair is calculated by multiplying the mean difference in QALY by NICE's recommended willingness-to-pay threshold (£30,000 per QALY gain) and subtracting from this the incremental cost.



**Table J** Unit costs (£ GBP) for analyses in table I

| Description                         | Unit    | Open repair | Endovascular strategy | Source                                                |
|-------------------------------------|---------|-------------|-----------------------|-------------------------------------------------------|
| Medical devices & parts             |         |             |                       |                                                       |
| Endovascular stent and parts        | Patient |             | 5 700                 | Medtronic©, Cook Medical© <sup>a</sup>                |
| Vascular graft (straight)           | Patient | 623         |                       | Maquet©                                               |
| Vascular graft (bifurcated)         | Patient | 901         |                       | Maquet©                                               |
| Consumables                         |         |             |                       |                                                       |
| Endovascular package                | Patient |             | 600                   | Maquet©, Cook Medical©                                |
| Mechanical retractor                | Patient | 90          |                       | Health-Care Equipment©                                |
| Cell Salvage                        | Patient | 74          |                       | Davies et al 2006 <sup>9</sup>                        |
| Surgical instrument set             | Patient | 51          | 51                    | HealthCare Equipment©                                 |
| Anaesthetics & other drugs          | Patient | 184         | 41                    | British National Formulary 2012 <sup>b</sup>          |
| Contrast agent                      | ml      | 0.10        | 0.10                  | IMPROVE centres <sup>b</sup>                          |
| Blood                               | unit    | 132         | 132                   | NHS Blood & Transplant 2012                           |
| Platelets                           | unit    | 205         | 205                   | NHS Blood & Transplant 2012                           |
| Fresh frozen plasma                 | unit    | 25          | 25                    | NHS Blood & Transplant 2012                           |
| CT scan                             | unit    | 105         | 105                   | NHS reference costs 2012                              |
| Emergency room                      | Minute  | 0.40        | 0.40                  | Dixon et al 2009 <sup>10</sup>                        |
| Overheads                           |         |             |                       |                                                       |
| Theatre                             | Minute  | 2.65        | 2.65                  | IMPROVE centres                                       |
| Staff <sup>c</sup>                  |         |             |                       |                                                       |
| Surgeon (consultant)                | Minute  | 2.20        | 2.20                  | PSSRU 2012 [Curtis 2012] <sup>11</sup>                |
| Surgeon (registrar)                 | Minute  | 1.16        | 1.16                  | PSSRU 2012                                            |
| Anaesthetist (consultant)           | Minute  | 2.20        | 2.20                  | PSSRU 2012                                            |
| Anaesthetist (registrar)            | Minute  | 1.16        | 1.16                  | PSSRU 2012                                            |
| ODA                                 | Minute  | 0.58        | 0.58                  | PSSRU 2012                                            |
| Scrub Nurse                         | Minute  | 0.72        | 0.72                  | PSSRU 2012                                            |
| Runner                              | Minute  | 0.58        | 0.58                  | PSSRU 2012                                            |
| Senior House Officer                | Minute  | 0.83        |                       | PSSRU 2012                                            |
| Radiologist (consultant)            | Minute  |             | 2.20                  | PSSRU 2012                                            |
| Radiologist (registrar)             | Minute  |             | 1.16                  | PSSRU 2012                                            |
| Radiographer                        | Minute  |             | 0.58                  | PSSRU 2012                                            |
| Radiologist Nurse                   | Minute  |             | 0.72                  | PSSRU 2012                                            |
| Critical care                       |         |             |                       |                                                       |
| ITU/HDU – 1 organ supported         | Bed-day | 630         | 630                   | NHS reference costs 2012 (DH 2012)                    |
| ITU/HDU – 2 organs supported        | Bed-day | 870         | 870                   | NHS reference costs 2012<br>reference costs 2010-2011 |
| ITU/HDU – 3 organs supported        | Bed-day | 1214        | 1214                  | NHS reference costs 2012                              |
| ITU/HDU – 4 organs supported        | Bed-day | 1410        | 1410                  | NHS reference costs 2012                              |
| ITU/HDU – 5 organs supported        | Bed-day | 1587        | 1587                  | NHS reference costs 2012                              |
| ITU/HDU – 6 organs supported        | Bed-day | 1759        | 1759                  | NHS reference costs 2012                              |
| ITU/HDU – 7 organs supported        | Bed-day | 2000        | 2000                  | NHS reference costs 2012                              |
| Other hospital care                 |         |             |                       |                                                       |
| Inpatient Coronary care unit        | Bed-day | 436         | 436                   | NHS reference costs 2012                              |
| Inpatient Stroke unit               | Bed-day | 309         | 309                   | NHS reference costs 2012                              |
| Inpatient Routine ward <sup>d</sup> | Bed-day | 260         | 260                   | NHS reference costs 2012                              |
| Outpatient doctor visit             | visit   | 139         | 139                   | PSSRU 2012                                            |
| Outpatient nurse visit              | visit   | 85          | 85                    | PSSRU 2012                                            |
| Outpatient Haemodialysis            | session | 65          | 65                    | NHS Blood & Transplant 2012                           |
| Community care                      |         |             |                       |                                                       |
| Nursing home                        | Bed-day | 105         | 105                   | PSSRU 2012                                            |
| Family doctor visit <sup>e</sup>    | visit   | 55          | 55                    | PSSRU 2012                                            |
| Nurse at home visit <sup>e</sup>    | visit   | 18          | 18                    | PSSRU 2012                                            |

<sup>a</sup>Average (range from £5 400 to £6 500) list price of the EVAR stents and parts most supplied to NHS Hospitals for ruptured AAA (Medtronic Endurant and Cook Medical Zenith Flex). <sup>b</sup>Local and general anaesthesia components were taken from one IMPROVE centre. <sup>c</sup>Typical levels of staff use in theatre were recorded in 10 IMPROVE centres. <sup>d</sup>Same tariff was applied to routine ward in both primary and secondary hospitals. <sup>e</sup>Assuming 15-minute appointments.
